# Supplementary material for: Establishment and validation of a prognostic nomogram for patients with resectable perihilar cholangiocarcinoma
Source: PubMed Central journal article supplement (PMC5095079; doi:10.18632/oncotarget.9104), 2016-04-29
Supplement: oncotarget-07-37319-s001.pdf [file oncotarget-07-37319-s001.pdf]

**SUPPLEMENTARY FIGURES**

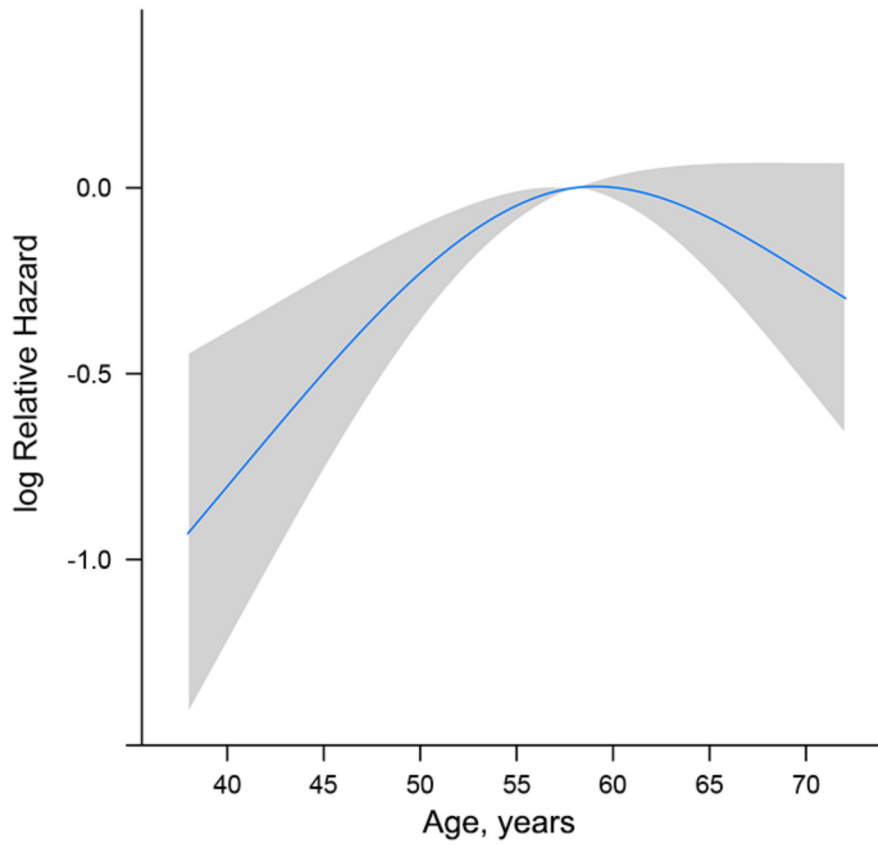

**Supplementary Figure S1: Restricted cubic splines transformation of the continuous variant, age, in univariate analyses.**

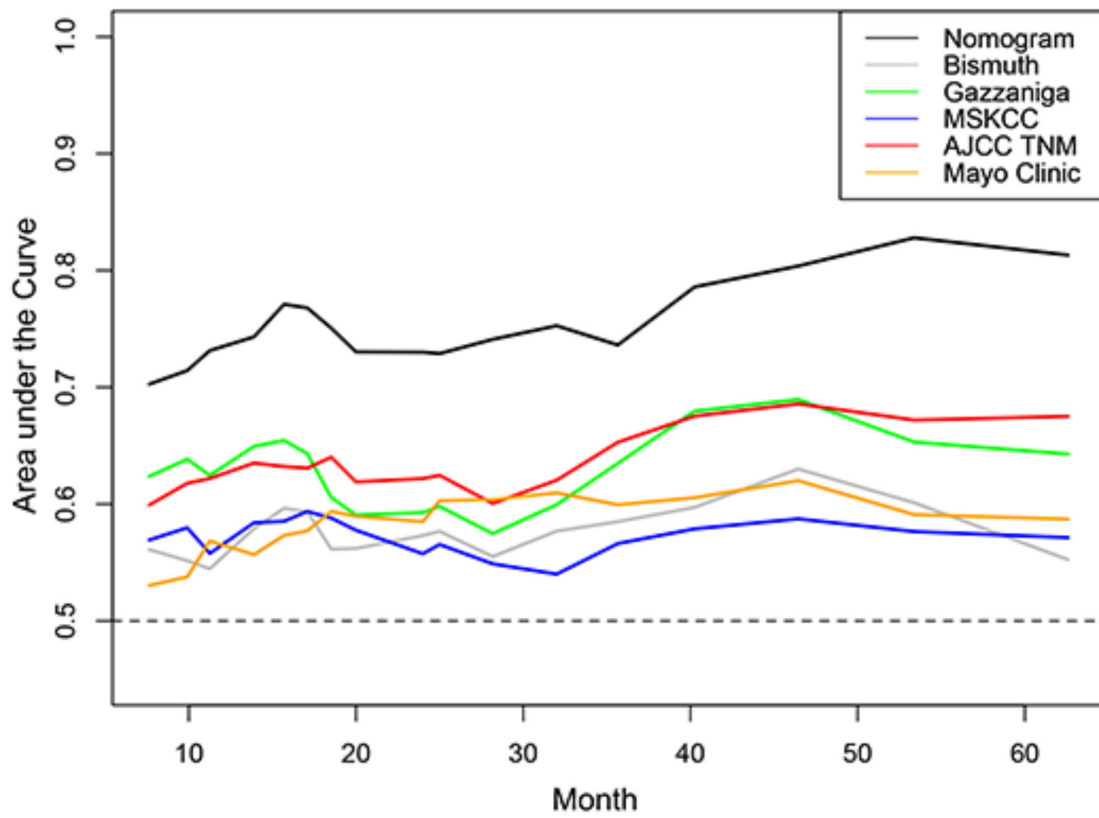

Supplementary Figure S2: Comparison of the time-dependent areas under the ROC curves of prediction by the nomogram and by the conventional staging systems in the primary cohort.

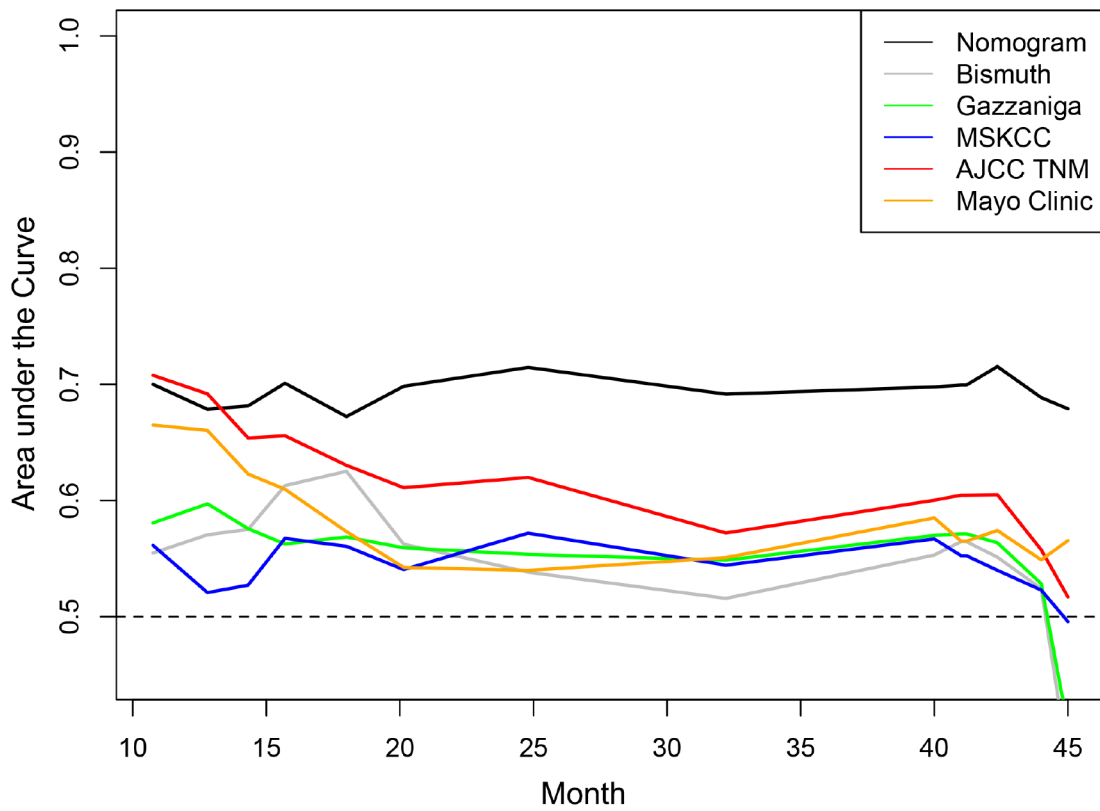

**Supplementary Figure S3: Comparison of the time-dependent areas under the ROC curves of prediction by the nomogram and by the conventional staging systems in the internal validation cohort (N = 93).**

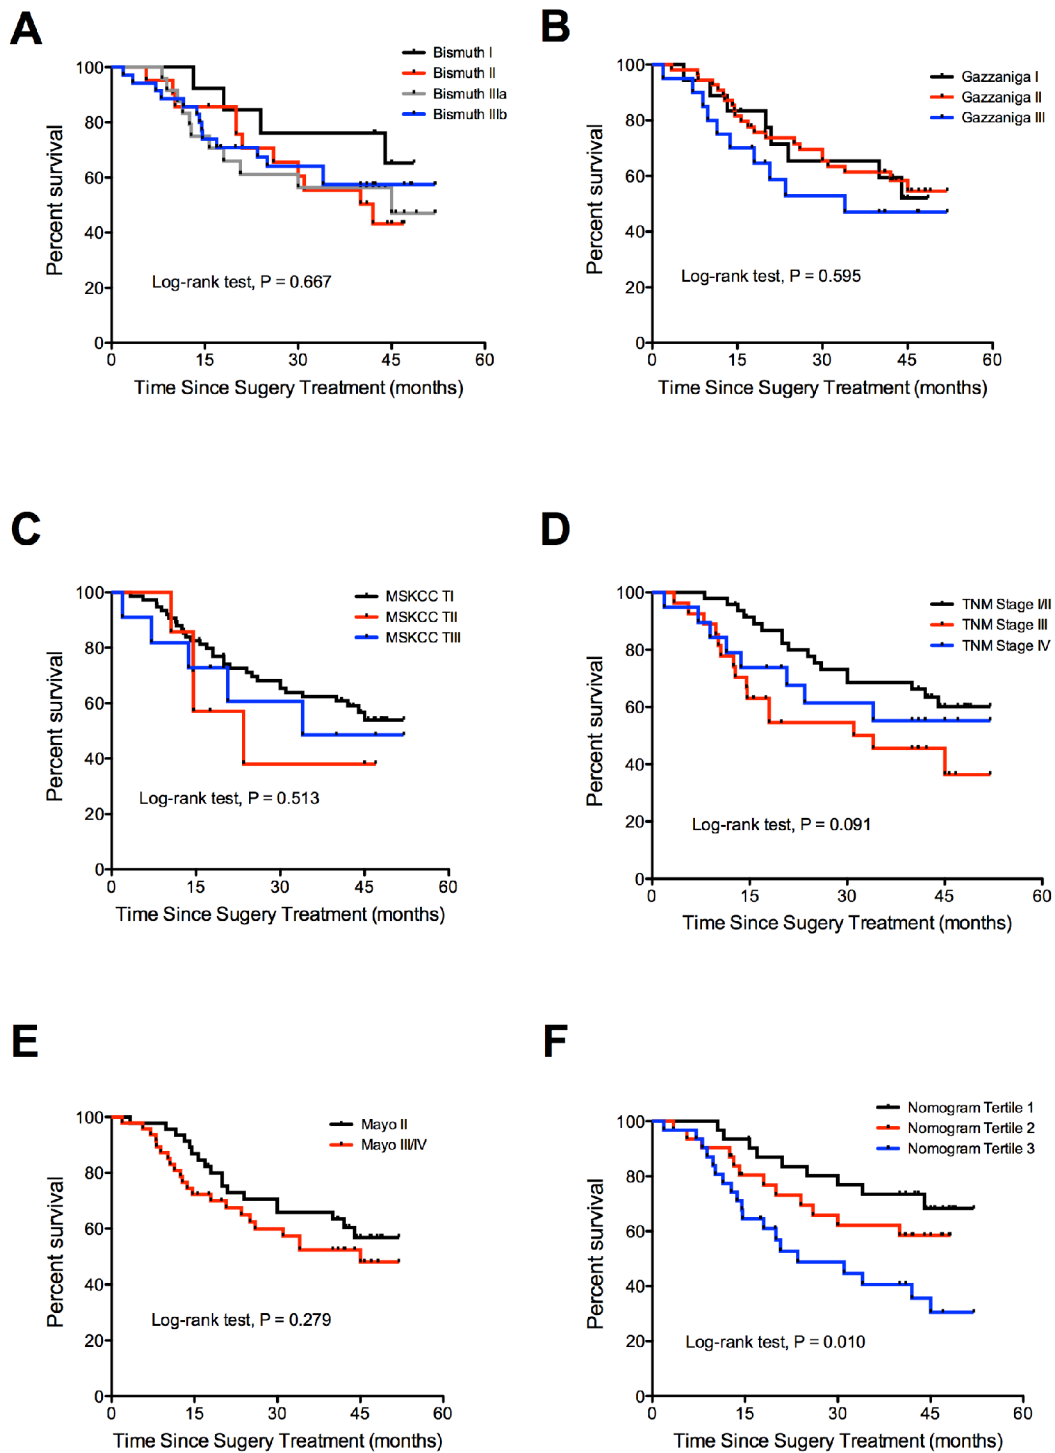

**Supplementary Figure S4: Kaplan-Meier survival curves for nomogram and the conventional staging systems in the internal validation cohort. (A. Bismuth-Corlette; B. Gazzaniga; C. MSKCC; D. AJCC TNM (seventh edition); E. Mayo Clinic; F. nomogram).**

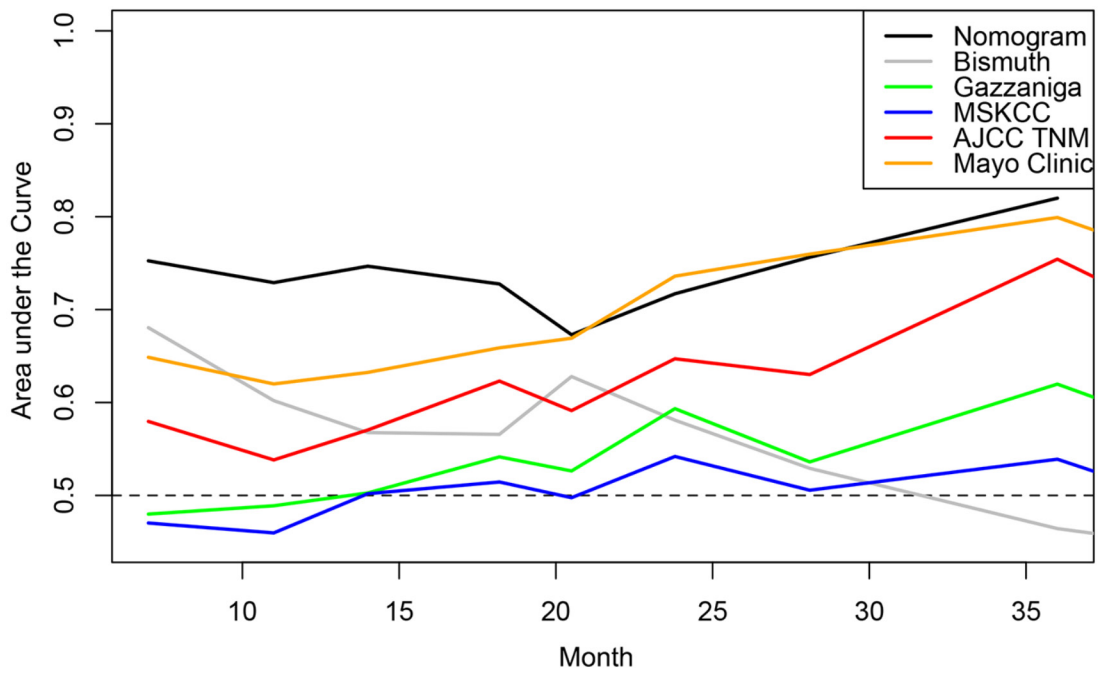

Supplementary Figure S5: Comparison of the time-dependent areas under the ROC curves of prediction by the nomogram and the conventional staging systems in the external validation cohort (N = 84).

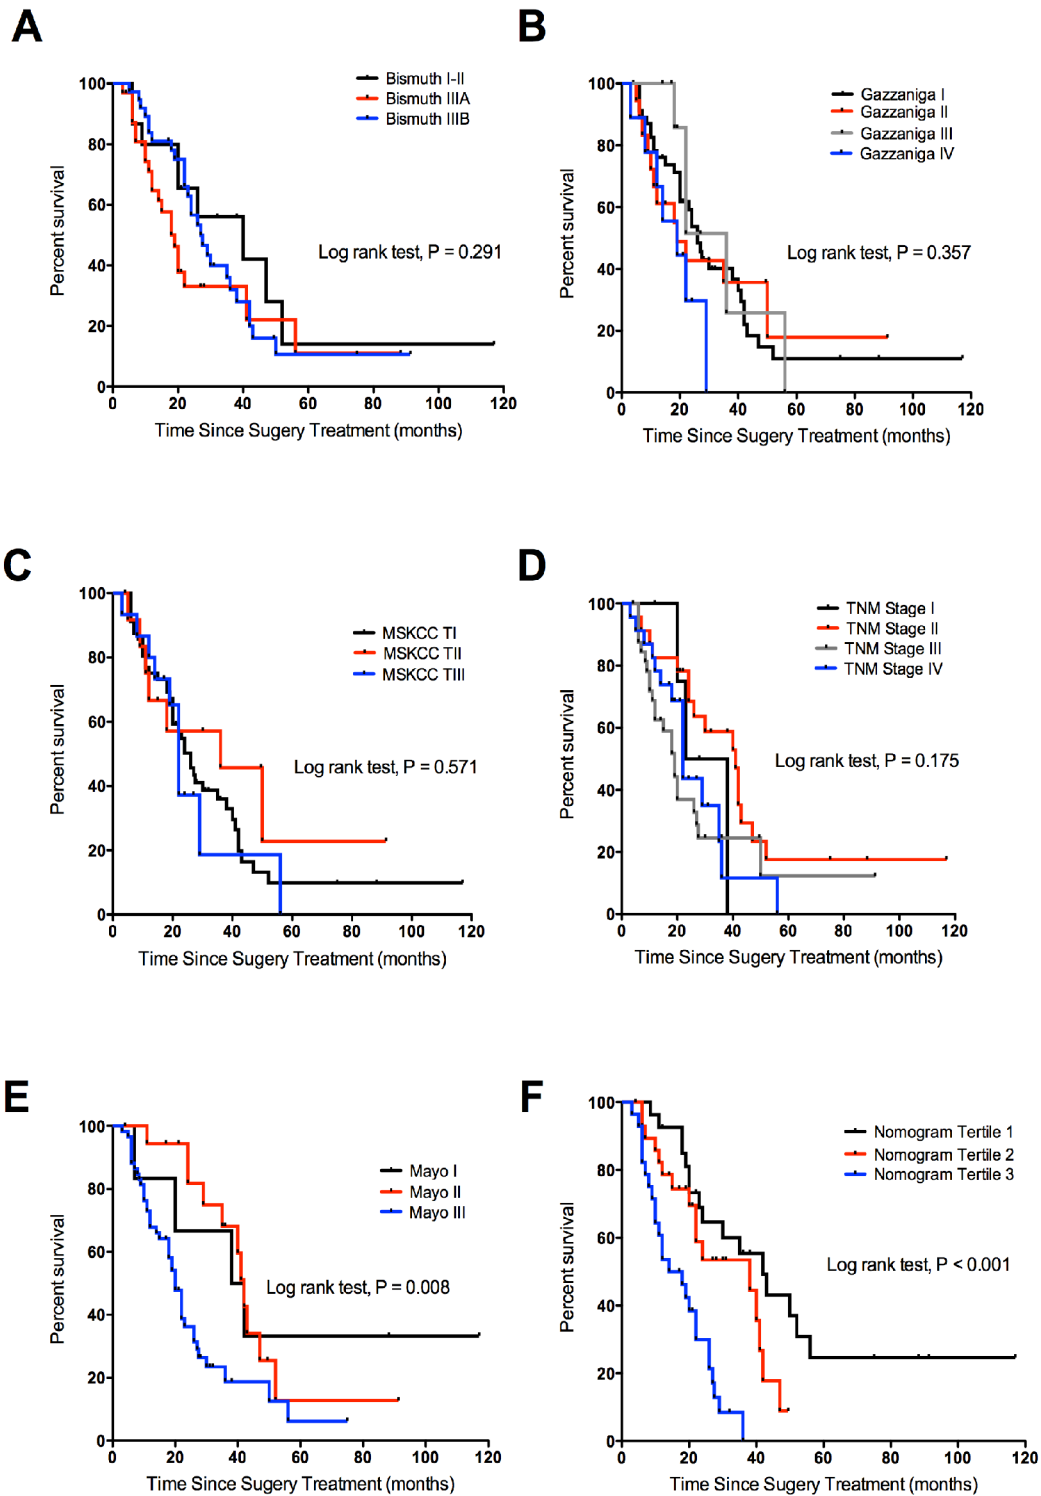

**Supplementary Figure S6: Kaplan-Meier survival curves for nomogram and the conventional staging systems in the external validation cohort. (A. Bismuth-Corlette; B. Gazzaniga; C. MSKCC; D. AJCC TNM (seventh edition); E. Mayo Clinic; F. nomogram).**
